# Supplementary material for: Perceptions of Health-Related Information on Facebook: Cross-Sectional Study Among Vietnamese Youths
Source: PubMed Central journal article supplement (PMC5608988; doi:10.2196/ijmr.8072), 2017-09-07
Supplement: ijmr_v6i2e16_app1.pdf [file ijmr_v6i2e16_app1.pdf]

**Multimedia Appendix 1: Associated factors with health information seeking behaviors and belief on Facebook among respondents**

| Factors                                                                                             | Concern |       |       | Belief |       |       | Sharing |       |       | Practice |       |       | Useful |       |      |
|-----------------------------------------------------------------------------------------------------|---------|-------|-------|--------|-------|-------|---------|-------|-------|----------|-------|-------|--------|-------|------|
|                                                                                                     | OR      | 95%CI |       | OR     | 95%CI |       | OR      | 95%CI |       | OR       | 95%CI |       | OR     | 95%CI |      |
| <b>Gender (Male vs Female)</b>                                                                      | 0.42*   | 0.31  | 0.58  |        |       |       |         |       |       | 0.84*    | 0.76  | 0.93  |        |       |      |
| <b>Age</b>                                                                                          |         |       |       | 0.87*  | 0.80  | 0.95  |         |       |       |          |       |       |        |       |      |
| <b>Education (vs ≤ High school)</b>                                                                 |         |       |       |        |       |       |         |       |       |          |       |       |        |       |      |
| Vocational training                                                                                 | 4.43    | 0.96  | 20.39 | 6.21*  | 1.55  | 24.84 |         |       |       | 3.96*    | 1.28  | 12.24 | 3.39   | 1.23  | 9.28 |
| College                                                                                             | 1.66    | 0.84  | 3.28  | 4.59*  | 1.54  | 13.71 |         |       |       |          |       |       | 1.84   | 1.05  | 3.23 |
| University                                                                                          |         |       |       | 2.56   | 0.97  | 6.75  |         |       |       |          |       |       |        |       |      |
| Graduate                                                                                            |         |       |       | 2.48   | 0.74  | 8.34  |         |       |       |          |       |       |        |       |      |
| <b>Living location (vs Rent hostel)</b>                                                             |         |       |       |        |       |       |         |       |       |          |       |       |        |       |      |
| living with family                                                                                  |         |       |       |        |       |       | 1.66*   | 1.03  | 2.68  | 2.19*    | 1.32  | 3.65  |        |       |      |
| Living with relatives                                                                               | 0.63    | 0.37  | 1.08  |        |       |       |         |       |       | 1.85     | 0.80  | 4.30  |        |       |      |
| Others                                                                                              |         |       |       |        |       |       | 5.56*   | 1.41  | 21.87 |          |       |       |        |       |      |
| <b>Religion (Cult of Ancestor vs Other)</b>                                                         | 1.85*   | 1.22  | 2.81  | 1.84*  | 1.05  | 3.20  |         |       |       |          |       |       |        |       |      |
| <b>Marital status (Single vs Living with spouse/partner)</b>                                        |         |       |       |        |       |       | 0.47*   | 0.29  | 0.76  | 0.66     | 0.39  | 1.14  |        |       |      |
| <b>Having acute disease in the last 4 weeks (Yes vs No)</b>                                         |         |       |       |        |       |       |         |       |       |          |       |       |        |       |      |
| <b>Having chronic disease in the last 3 months (Yes vs No)</b>                                      | 1.34    | 0.90  | 1.99  |        |       |       |         |       |       | 0.44     | 0.13  | 1.46  | 1.28   | 0.89  | 1.82 |
| <b>Overweight/obesity (Yes vs No)</b>                                                               |         |       |       |        |       |       |         |       |       |          |       |       | 0.36*  | 0.20  | 0.65 |
| <b>Having usual activities problem (Yes vs No)</b>                                                  |         |       |       |        |       |       |         |       |       |          |       |       | 1.53*  | 1.10  | 2.14 |
| <b>Pain/discomfort (Yes vs No)</b>                                                                  |         |       |       |        |       |       | 1.59    | 0.89  | 2.84  |          |       |       |        |       |      |
| <b>Perceived stress score</b>                                                                       | 0.89*   | 0.83  | 0.95  | 0.94   | 0.87  | 1.02  | 0.90    | 0.80  | 1.00  |          |       |       | 0.94   | 0.88  | 1.00 |
| <b>EQ-VAS</b>                                                                                       |         |       |       |        |       |       |         |       |       |          |       |       | 0.99   | 0.98  | 1.00 |
| <b>EQ-index</b>                                                                                     |         |       |       |        |       |       | 0.27    | 0.06  | 1.22  |          |       |       |        |       |      |
| <b>Current smokers (Yes vs No)</b>                                                                  | 1.41    | 0.84  | 2.39  | 1.63   | 0.97  | 2.75  |         |       |       |          |       |       |        |       |      |
| <b>Shisha smokers (Yes vs No)</b>                                                                   | 0.54    | 0.27  | 1.09  |        |       |       |         |       |       |          |       |       | 0.48   | 0.23  | 1.02 |
| <b>Talk and meet new online friends (vs Rarely/Never)</b>                                           |         |       |       |        |       |       |         |       |       |          |       |       |        |       |      |
| Sometimes                                                                                           |         |       |       |        |       |       | 2.66*   | 1.59  | 4.46  | 1.54     | 0.89  | 2.69  | 1.34   | 0.97  | 1.85 |
| ≥ Often                                                                                             |         |       |       |        |       |       | 2.65*   | 1.26  | 5.56  | 2.59*    | 1.24  | 5.42  | 1.72*  | 1.01  | 2.92 |
| <b>Effects of online relationships on behaviors, lifestyle and perception (vs Low/No influence)</b> |         |       |       |        |       |       |         |       |       |          |       |       |        |       |      |
| High                                                                                                |         |       |       | 1.54   | 0.86  | 2.74  | 2.20*   | 1.05  | 4.60  | 2.37*    | 1.16  | 4.84  |        |       |      |
| <b>Go to place introduced by online friends (vs Rarely/Never)</b>                                   |         |       |       |        |       |       |         |       |       |          |       |       |        |       |      |
| Sometimes                                                                                           | 1.72*   | 1.23  | 2.41  |        |       |       | 0.67    | 0.42  | 1.08  |          |       |       |        |       |      |
| ≥ Often                                                                                             | 2.17*   | 1.29  | 3.63  |        |       |       |         |       |       | 1.41     | 0.75  | 2.67  | 2.02*  | 1.35  | 3.03 |
| <b>Try to do anything introduced by online friends (vs Rarely/Never)</b>                            |         |       |       |        |       |       |         |       |       |          |       |       |        |       |      |
| Sometimes                                                                                           | 1.49*   | 1.09  | 2.04  |        |       |       |         |       |       | 1.74     | 0.99  | 3.04  |        |       |      |
| ≥ Often                                                                                             |         |       |       |        |       |       |         |       |       | 1.84     | 0.79  | 4.26  |        |       |      |

\*p<0.05
